# Supplementary material
Source: MDPI journal article supplement (https://www.mdpi.com/2073-4336/1/4/478)
Supplement: s1 [file s1]

Correction

## **Correction: Lorini, E. *et al.* A Modal Logic of Epistemic Games. *Games* 2010, 1, 478-526**

**Emiliano Lorini \* and François Schwarzentruber \***

IRIT-CNRS, Université de Toulouse, 118 route de Narbonne, 31062 Toulouse, France

\* Author to whom correspondence should be addressed. E-Mails: lorini@irit.fr, schwarze@irit.fr.

*Received: 5 November 2010 / Published: 8 November 2010*

---

In the first line of the abstract the sentence: “We propose some variants of a multi-modal of joint action, preference and knowledge that support reasoning about epistemic games in strategic form.” should be replaced by the sentence: “We propose some variants of a multi-modal logic of joint action, preference and knowledge that support reasoning about epistemic games in strategic form.”

### **References**

1. Lorini, E.; Schwarzentruber, F. A modal logic of epistemic games. *Games* **2010**, *1*, 478–526.

© 2010 by the authors; licensee MDPI, Basel, Switzerland. This article is an open access article distributed under the terms and conditions of the Creative Commons Attribution license (<http://creativecommons.org/licenses/by/3.0/>).
